# Supplementary material for: Predicting Functional Alternative Splicing by Measuring RNA Selection Pressure from Multigenome Alignments
Source: PLOS journal article supplement (doi:10.1371/journal.pcbi.1000608), 2009-12-17

**Table S5. RT-PCR Validation of 10 Brain-Specific Exons**

We performed RT-PCR experiments to test a subset of the RSPR predictions. Tissue-specific splicing is one type of functional regulation that can be assayed easily in a panel of different tissue samples. We therefore extracted a subset of high RSPR exons that were also predicted by bioinformatics to up-regulated in brain based on available EST counts. We assayed their splicing by RT-PCR in cerebellum, heart, kidney and seven other human tissues. 80% (8/10) were found to be regulated in a tissue-specific manner. Thus a large fraction of high-RSPR exons were validated by experimental evidence of functional regulation.

**A, Exons**

| GENE     | EXON LOCATION IN hg18    | RSPR  | P <sub>RSPR</sub>     | RT-PCR RESULT                                                      |
|----------|--------------------------|-------|-----------------------|--------------------------------------------------------------------|
| EXOC7    | chr17:71594530-71594568  | 6.24  | 1.6X10 <sup>-10</sup> | Brain specific exon inclusion                                      |
| PLEKHB1  | chr11:73044496-73044600  | 4.01  | 3.6X10 <sup>-08</sup> | No change in splicing observed                                     |
| FLJ11730 | chr1:37734895-37734924   | 6.07  | 4.0X10 <sup>-08</sup> | Brain specific exon inclusion                                      |
| LYK5     | chr17:59154390-59154418  | 25.37 | 1.1X10 <sup>-11</sup> | Brain specific exon inclusion, heart and muscle to a lesser degree |
| TBC1D1   | chr4:37731122-37731241   | 6.42  | 4.2X10 <sup>-28</sup> | Brain, heart, muscle and testes specific exon inclusion            |
| SEC3L1   | chr4:56427795-56427815   | 6.60  | 1.8X10 <sup>-06</sup> | Brain specific exon inclusion                                      |
| FLJ13611 | chr5:64987219-64987236   | 47.94 | 3.3X10 <sup>-09</sup> | Brain specific exon skipping                                       |
| DCTN4    | chr5:150091641-150091661 | 8.62  | 3.1X10 <sup>-10</sup> | Brain specific exon inclusion                                      |
| G3BP2    | chr4:76798191-76798289   | 6.68  | 3.6X10 <sup>-18</sup> | Brain specific exon inclusion, heart and muscle to a lesser degree |
| AP2A1    | chr19:54997603-54997668  | 5.15  | 1.0X10 <sup>-08</sup> | Brain specific exon inclusion, heart and muscle to a lesser degree |

**B, Primers**

| GENE NAME | LEFT PRIMER          | RIGHT PRIMER         |
|-----------|----------------------|----------------------|
| EXOC7     | GACCCGGACAAGGAGTACAA | TCTCCAGGGACTTGAGGATG |
| PLEKHB1   | ACTGCTGGAGGCAAACCTCC | AGTAGCTGCGGACATACGTG |
| FLJ11730  | GATGGATCTGTGCAGGGAGT | GAGGTCAGAGAAGGGAAGCA |
| LYK5      | GTACTCCCCTCCCAGCAAC  | CTCGTAACACCCTCCCTCTG |
| TBC1D1    | GCCATCTGTGTGTGAAAAGG | AGGAATATCTGCTGCCTCCA |
| SEC3L1    | TATAAATGGGTTGCCAGCAG | TGCAGCTCTCTGGACAATTT |
| FLJ13611  | AACCATTGGATGTGAAAACC | TCCAGCTTGGCTGACTGAAT |
| DCTN4     | AGATCGCAAGAACTGGCAC  | GGCAAGGGTACTGATGGATG |
| G3BP2     | CTACTACTCCTCCTCCGGCA | CCAGGTCGTTCTCTAGGTCG |
| AP2A1     | CAGGGAACCTTCTGGTGGA  | ATTCAGCAACTCATCGGCTT |

**C, Result,**

The target exon with RSPR annotated is in black.

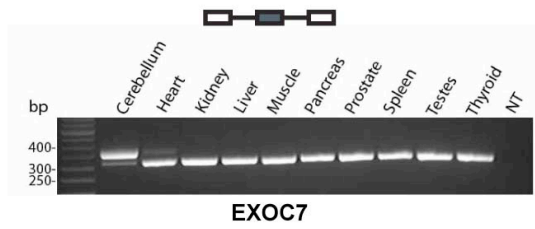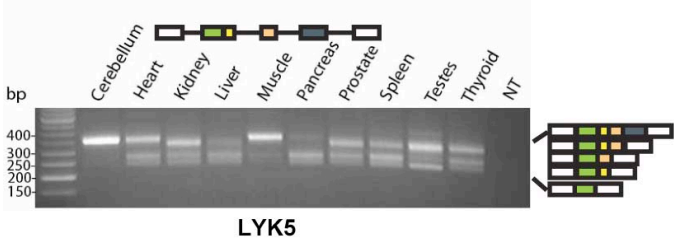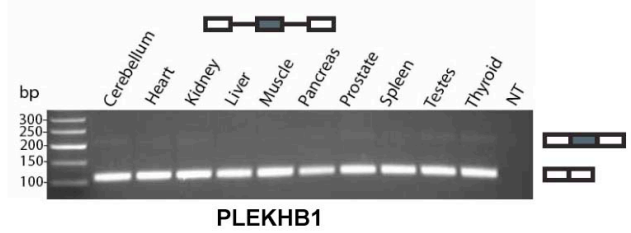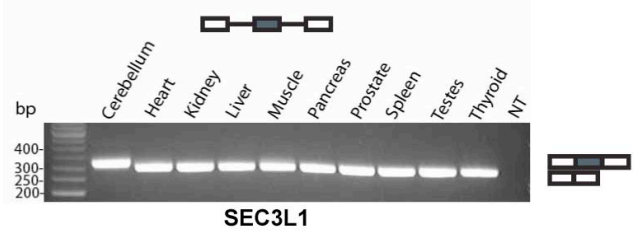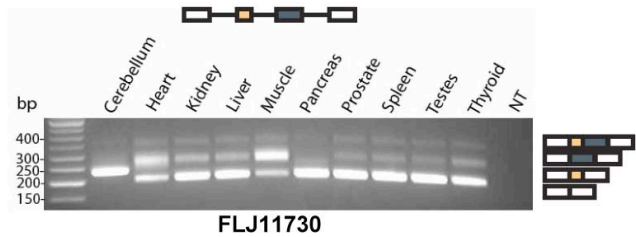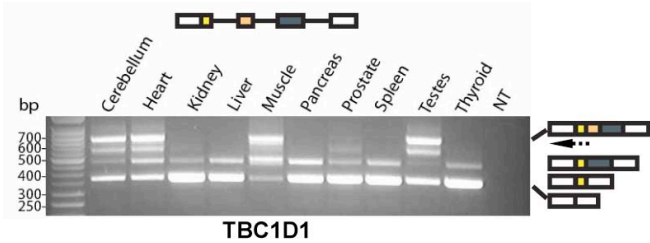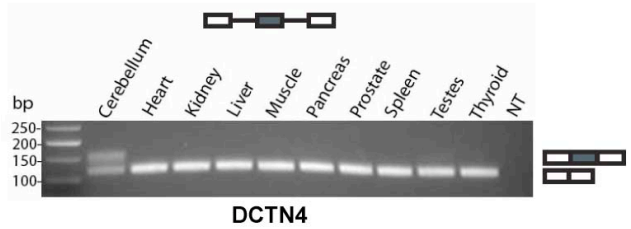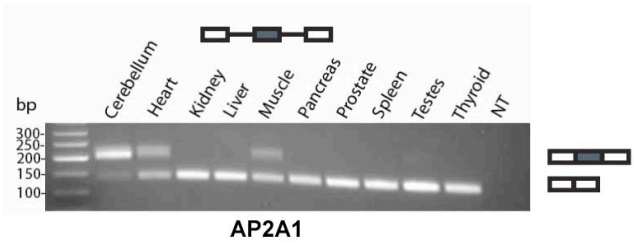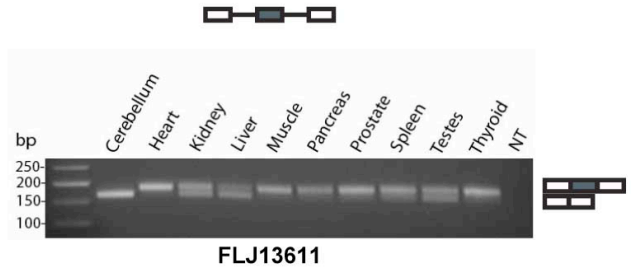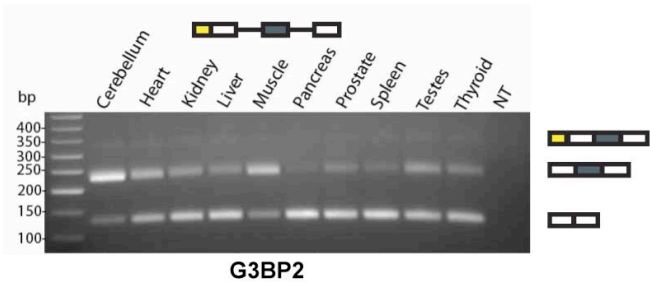

Supplement: S5 (10.1371/journal.pcbi.1000608.s005) [file journal.pcbi.1000608.s005]
